# Supplementary material
Source: PubMed Central journal article supplement (PMC5127408)
Supplement: NIHMS823935-supplement-2.pdf [file NIHMS823935-supplement-2.pdf]

## Subject-level Data Description

Seaman, K.L., Gorlick, Vekaria, K.M., M.A., Hsu, M., Zald, D.H., & Samanez-Larkin, G.R. (in press) Adult age differences in decision making across domains: Increased discounting of social and health-related rewards. *Psychology and Aging*.

Please note that the data are in “long” format; there are nine rows for each participant, one row for each task completed. Below is a description of each variable found in the data set.

**partNum** – Participant ID

**task** – The specific task performed with both discounting factor and reward domain (i.e. effort\_health or time\_money)

**model** – Description of best-fitting model fit to the data

**k** – discount rate from the best-fitting hyperbolic model

**propImmediate** – Proportion of trials where the sooner/higher probability/easier option was chosen.

**domainTask** – Discounting factor for the task (effort, probability or time)

**domainReward** – Reward domain for the task (money, social or health)

**Education** – Education of subject (in years)

**Income** - Total Household Income is from an ordinal scale where 6 = \$60,000-\$79,999 and 7 = \$80,000-\$99,999

**PADelayedRecall** – WMS-III, Wechsler Memory Scale- Third Edition Paired Associates Delayed Recall Score

**DigitSpanTotal** - WMS-III, Wechsler Memory Scale- Third Edition Digit Span Total Score

**LetterNumSeq** - WAIS-III, Letter-Number Sequencing

**TrailsDIFF** – Trail Making Test Score (B – A)

**ShipleyRaw** - Shipley Vocabulary Subscale Score

**Numeracy** – Numeracy Score

**smq-info** – Social Motives Questionnaire, Information-Seeking motivation score. See supplemental materials for more information.

**smq-emo** – Social Motive Questionnaire, Emotional-Meaning motivation score. See supplemental materials for more information.

**ftp** – Future Time Perspective score

**Age, Sex, Sex, Ethnicity** – Demographic variables

**ageGroup** – Age group category (young, middle age, older) used in Table 1 of manuscript
